# Supplementary material for: Decolonizing Global Health Research: Perspectives from US and International Global Health Trainees
Source: PubMed Central journal article supplement (PMC9912860; doi:10.5334/aogh.3961), 2023-02-06
Supplement: agh-89-1-3961-s1.pdf [file agh-89-1-3961-s1.pdf]

## SUPPLEMENTARY MATERIALS/APPENDIX

DeCamp, Matandika, Chinula, et al. Decolonizing global health research: Perspectives from US and international global health trainees.

**Table S1.** Respondent and non-respondent analysis

| CHARACTERISTIC              | Entire program<br>(N=111) | Respondents<br>(n=61) | Non-respondents<br>(n=50) | P value |
|-----------------------------|---------------------------|-----------------------|---------------------------|---------|
| Gender <sup>‡</sup>         |                           |                       |                           |         |
| a. Female                   | 73 (65.8%)                | 35 (58.3%)            | 38 (74.5%)                | 0.073*  |
| b. Male                     | 38 (34.2%)                | 25 (41.7%)            | 13 (25.5%)                |         |
| Pre-postdoc (proxy<br>age?) | 70 (63.1%)                | 45 (73.8%)            | 25 (50.0%)                | 0.010*  |
| a. Post                     | 41 (36.9%)                | 16 (26.2%)            | 25 (50.0%)                |         |
| Country                     |                           |                       |                           | 0.450*  |
| a. HIC                      | 69 (62.1%)                | 36 (59.0%)            | 33 (66.0%)                |         |
| b. LMIC                     | 42 (37.8%)                | 25 (41.0%)            | 17 (34.0%)                |         |
| Country                     |                           |                       |                           | 0.310*  |
| <b>a. HIC</b>               | <b>69 (62.1%)</b>         | <b>36 (50.0%)</b>     | <b>33 (64.7%)</b>         |         |
| HIC & Female <sup>‡</sup>   | 55 (79.7%)                | 27 (75%)              | 28 (84.8%)                |         |
| HIC & Male <sup>‡</sup>     | 14 (20.3%)                | 9 (25%)               | 5 (15.2%)                 |         |
| <b>b. LMIC</b>              | <b>42 (37.8%)</b>         | <b>24 (40.0%)</b>     | <b>18 (35.3%)</b>         | 0.150*  |
| LMIC & Female <sup>‡</sup>  | 18 (42.9%)                | 8 (33.3%)             | 10 (55.6%)                |         |
| LMIC & Male <sup>‡</sup>    | 24 (57.1%)                | 16 (66.7%)            | 8 (44.4%)                 |         |
| Year of Study               |                           |                       |                           | 0.099*  |
| a. 2017-2018                | 21 (18.9%)                | 11 (18.0%)            | 10 (20.0%)                |         |
| b. 2018-2019                | 18 (16.2%)                | 8 (13.1%)             | 10 (20.0%)                |         |
| c. 2019-2020                | 27 (24.3%)                | 12 (19.7%)            | 15 (30.0%)                |         |
| d. 2020-2021                | 24 (21.6%)                | 13 (21.3%)            | 11 (22.0%)                |         |
| e. 2011-2022                | 21 (18.9%)                | 17 (27.9%)            | 4 (8.0%)                  |         |

\* Chi-square test.

<sup>‡</sup> Analyses by gender do not add up to 61 because one participant did not answer the gender item.

**Figure S1** Perceptions of the Impact of Colonialism on Various Aspects of Global Health with “Neutral” Category Removed (all respondents)

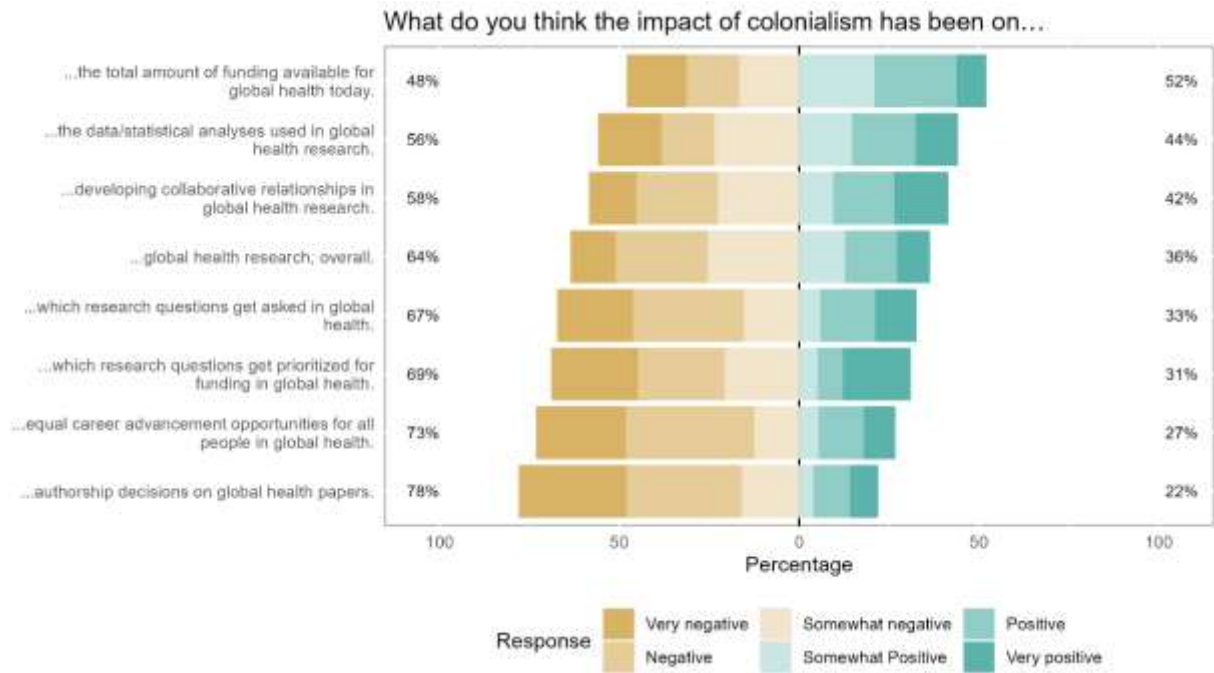

**TABLE S2.** Perceptions of the Impact of Colonialism on Various Aspects of Global Health Among Mentors

| <i>What do you think the impact of colonialism has been on...</i>                        | All respondents (n=26) | HIC respondents (n=16) | LMIC respondents (n=10) | P value            |
|------------------------------------------------------------------------------------------|------------------------|------------------------|-------------------------|--------------------|
| <b>...the total amount of <u>funding</u> available for global health today</b>           |                        |                        |                         | 0.585 <sup>†</sup> |
| a. Negative                                                                              | 12 (46.2%)             | 6 (37.5%)              | 6 (60.0%)               |                    |
| b. Neutral                                                                               | 5 (19.2%)              | 4 (25.0%)              | 1 (10.0%)               |                    |
| c. Positive                                                                              | 9 (34.6%)              | 6 (7.5%)               | 3 (30.0%)               |                    |
| <b>...which <u>research questions</u> get asked in global health.</b>                    |                        |                        |                         | 0.680 <sup>†</sup> |
| a. Negative                                                                              | 18 (69.2%)             | 10 (62.5%)             | 8 (80.0%)               |                    |
| b. Neutral                                                                               | 2 (7.7%)               | 2 (12.5%)              | 0 (0.0%)                |                    |
| c. Positive                                                                              | 6 (23.1%)              | 4 (25.0%)              | 2 (20.0%)               |                    |
| <b>... which <u>research questions</u> get prioritized for funding in global health.</b> |                        |                        |                         | 0.437 <sup>†</sup> |
| a. Negative                                                                              | 18 (69.2%)             | 10 (62.5%)             | 8 (80.0%)               |                    |
| b. Neutral                                                                               | 2 (7.7%)               | 1 (6.3%)               | 1 (10.0%)               |                    |
| c. Positive                                                                              | 6 (23.1%)              | 5 (31.3%)              | 1 (10.0%)               |                    |
| <b>...<u>developing collaborative relationships</u> in global health research.</b>       |                        |                        |                         | 0.052 <sup>†</sup> |
| a. Negative                                                                              | 12 (46.2%)             | 6 (37.5%)              | 6 (60.0%)               |                    |
| b. Neutral                                                                               | 7 (26.9%)              | 7 (43.8%)              | 0 (0.0%)                |                    |
| c. Positive                                                                              | 7 (26.9%)              | 3 (18.8%)              | 4 (40.0%)               |                    |
| <b>...the <u>data/statistical analyses</u> used in global health research.</b>           |                        |                        |                         | 0.158 <sup>†</sup> |
| a. Negative                                                                              | 12 (46.2%)             | 5 (31.6%)              | 7 (70.0%)               |                    |
| b. Neutral                                                                               | 11 (42.3%)             | 9 (56.3%)              | 2 (20.0%)               |                    |
| c. Positive                                                                              | 3 (11.5%)              | 2 (12.5%)              | 1 (10.0%)               |                    |
| <b>...<u>authorship</u> decisions on global health papers.</b>                           |                        |                        |                         | 1.000 <sup>†</sup> |
| a. Negative                                                                              | 19 (73.1%)             | 12 (75.0%)             | 7 (70.0%)               |                    |
| b. Neutral                                                                               | 4 (15.4%)              | 2 (12.5%)              | 2 (20.0%)               |                    |
| c. Positive                                                                              | 3 (11.5%)              | 2 (12.5%)              | 1 (10.0%)               |                    |
| <b>...<u>equal career advancement opportunities</u> for all people in global health.</b> |                        |                        |                         | 0.549 <sup>†</sup> |
| a. Negative                                                                              | 21 (80.8%)             | 13 (81.3%)             | 8 (80.0%)               |                    |
| b. Neutral                                                                               | 4 (15.4%)              | 3 (18.6%)              | 1 (10.0%)               |                    |

|                                            |            |           |           |                    |
|--------------------------------------------|------------|-----------|-----------|--------------------|
| c. Positive                                | 1 (3.9%)   | 0 (0.0%)  | 1 (10.0%) |                    |
| <b>...global health research, overall.</b> |            |           |           | 0.511 <sup>†</sup> |
| a. Negative                                | 17 (65.4%) | 9 (56.3%) | 8 (80.0%) |                    |
| b. Neutral                                 | 4 (15.4%)  | 3 (18.6%) | 1 (10.0%) |                    |
| c. Positive                                | 5 (19.2%)  | 4 (25.0%) | 1 (10.0%) |                    |

<sup>†</sup> Fisher's exact test.

**Table S3.** Perceptions of the Impact of Colonialism on Several Aspects of Global Health (additional analyses)

| <i>What do you think the impact of colonialism has been on...</i>                  | All (n=61) | HIC (n=36) | LMIC (n=25) | P value             | Female (n=35) | Male (n=25) | P value            | All (mean/ iqr) | HIC (mean/ iqr) | LMIC (mean/ iqr) | P value                                                           |
|------------------------------------------------------------------------------------|------------|------------|-------------|---------------------|---------------|-------------|--------------------|-----------------|-----------------|------------------|-------------------------------------------------------------------|
| <b>....the total amount of funding available for global health today</b>           |            |            |             | 0.602*              |               |             | 0.932*             | 4.0 / 2.0       | 3.9 / 2.5       | 4 / 3.0          | 0.937 <sup>¥</sup><br>0.908 <sup>Ⓜ</sup><br>0.893 <sup>Ⓜ</sup>    |
| a. Negative                                                                        | 23 (37.7%) | 12 (33.3%) | 11 (44.0%)  |                     | 13 (37.1%)    | 9 (36.0%)   |                    |                 |                 |                  |                                                                   |
| b. Neutral                                                                         | 13 (21.3%) | 9 (25.0%)  | 4 (16.0%)   |                     | 7 (20.0%)     | 6 (24.0%)   |                    |                 |                 |                  |                                                                   |
| c. Positive                                                                        | 25 (41.0%) | 15 (41.7%) | 10 (40.0%)  |                     | 15 (42.9%)    | 10 (40.0%)  |                    |                 |                 |                  |                                                                   |
| <b>...which research questions get asked in global health.</b>                     |            |            |             | 0.012*              |               |             | 0.192*             | 3.4 / 3.0       | 2.9 / 2.0       | 4.1 / 4.0        | 0.079 <sup>¥</sup><br>0.028 <sup>Ⓜ</sup><br>0.134 <sup>Ⓜ</sup>    |
| a. Negative                                                                        | 35 (57.4%) | 24 (66.7%) | 11 (44.0%)  |                     | 23 (65.7%)    | 11 (44.0%)  |                    |                 |                 |                  |                                                                   |
| b. Neutral                                                                         | 9 (14.8%)  | 7 (19.4%)  | 2 (8.0%)    |                     | 5 (14.3%)     | 4 (16.0%)   |                    |                 |                 |                  |                                                                   |
| c. Positive                                                                        | 17 (27.9%) | 5 (13.9%)  | 12 (48.0%)  |                     | 7 (20.0%)     | 10 (40.0%)  |                    |                 |                 |                  |                                                                   |
| <b>.... which research questions get prioritized for funding in global health.</b> |            |            |             | 0.088*              |               |             | 0.065*             | 3.4 / 3.0       | 2.3 / 1.5       | 4.0 / 6.0        | 0.219 <sup>¥</sup><br>0.083 <sup>Ⓜ</sup><br>0.113 <sup>Ⓜ</sup>    |
| a. Negative                                                                        | 40 (65.6%) | 27 (75.0%) | 13 (52.0%)  |                     | 25 (71.4%)    | 14 (56.0%)  |                    |                 |                 |                  |                                                                   |
| b. Neutral                                                                         | 3 (4.9%)   | 2 (5.6%)   | 1 (4.0%)    |                     | 3 (8.6%)      | 0 (0.0%)    |                    |                 |                 |                  |                                                                   |
| c. Positive                                                                        | 18 (29.5%) | 7 (19.4%)  | 11 (44.0%)  |                     | 7 (20.0%)     | 11 (44.0%)  |                    |                 |                 |                  |                                                                   |
| <b>...developing collaborative relationships in global health research.</b>        |            |            |             | <0.001 <sup>Ⓜ</sup> |               |             | 0.120 <sup>Ⓜ</sup> | 3.8 / 4.0       | 3.1 / 2.0       | 4.9 / 2.0        | <0.001 <sup>¥</sup><br><0.001 <sup>Ⓜ</sup><br><0.001 <sup>Ⓜ</sup> |
| a. Negative                                                                        |            |            |             |                     |               |             |                    |                 |                 |                  |                                                                   |
| b. Neutral                                                                         | 31 (50.8%) | 25 (69.4%) | 6 (24.0%)   |                     | 20 (57.1%)    | 10 (40.0%)  |                    |                 |                 |                  |                                                                   |
| c. Positive                                                                        | 8 (13.1%)  | 5 (13.9%)  | 3 (12.0%)   |                     | 6 (17.1%)     | 2 (8.0%)    |                    |                 |                 |                  |                                                                   |
|                                                                                    | 22 (36.1%) | 6 (16.7%)  | 16 (64.0%)  |                     | 9 (25.1%)     | 13 (52.0%)  |                    |                 |                 |                  |                                                                   |
| <b>...the data/statistical analyses used in global health</b>                      |            |            |             | <0.001*             |               |             | 0.568*             | 3.9 /           | 3.6 /           | 4.3 /            | 0.083 <sup>¥</sup>                                                |

|                                                                                          |            |            |            |                    |            |            |                    |           |           |           |                    |
|------------------------------------------------------------------------------------------|------------|------------|------------|--------------------|------------|------------|--------------------|-----------|-----------|-----------|--------------------|
| <b>research.</b>                                                                         | 19 (31.2%) | 11 (30.6%) | 8 (32.0%)  |                    | 12 (34.3%) | 7 (28.0%)  |                    | 1.0       | 1.0       | 3.0       | 0.100 <sup>▣</sup> |
| a. Negative                                                                              | 27 (44.3%) | 22 (61.1%) | 5 (20.0%)  |                    | 16 (45.7%) | 10 (40.0%) |                    |           |           |           | 0.001 <sup>Ψ</sup> |
| b. Neutral                                                                               | 15 (24.6%) | 3 (8.3%)   | 12 (48.0%) |                    | 7 (20.0%)  | 8 (32.0%)  |                    |           |           |           |                    |
| c. Positive                                                                              |            |            |            |                    |            |            |                    |           |           |           |                    |
| <b>...<u>authorship decisions</u> on global health papers.</b>                           | 39 (63.9%) | 27 (75.0%) | 12 (48.0%) | 0.092 <sup>♠</sup> | 24 (68.6%) | 14 (56.0%) | 0.570 <sup>♠</sup> | 3.0 / 2.0 | 2.7 / 1.5 | 3.4 / 4.0 | 0.217 <sup>¥</sup> |
| a. Negative                                                                              | 11 (18.0%) | 5 (13.9%)  | 6 (24.0%)  |                    | 5 (14.3%)  | 6 (24.0%)  |                    |           |           |           | 0.121 <sup>▣</sup> |
| b. Neutral                                                                               | 11 (18.0%) | 4 (11.1%)  | 7 (28.0%)  |                    | 6 (17.1%)  | 5 (20.0%)  |                    |           |           |           | 0.251 <sup>Ψ</sup> |
| c. Positive                                                                              |            |            |            |                    |            |            |                    |           |           |           |                    |
| <b>...<u>equal career advancement opportunities</u> for all people in global health.</b> | 41 (67.2%) | 28 (77.8%) | 13 (52.0%) | 0.060 <sup>♠</sup> | 25 (71.4%) | 15 (60.0%) | 0.257 <sup>♠</sup> | 3.0 / 2.0 | 2.6 / 1.5 | 3.7 / 4.0 | 0.094 <sup>¥</sup> |
| a. Negative                                                                              | 5 (8.2%)   | 3 (8.3%)   | 2 (8.0%)   |                    | 4 (11.41%) | 1 (4.0%)   |                    |           |           |           | 0.043 <sup>▣</sup> |
| b. Neutral                                                                               | 15 (24.6%) | 5 (13.9%)  | 10 (40.0%) |                    | 6 (17.1%)  | 9 (36.0%)  |                    |           |           |           | 0.202 <sup>Ψ</sup> |
| c. Positive                                                                              |            |            |            |                    |            |            |                    |           |           |           |                    |
| <b>...<u>global health research</u>, overall.</b>                                        | 35 (57.4%) | 24 (66.7%) | 11 (44.0%) | 0.129 <sup>♠</sup> | 21 (60.0%) | 13 (52.0%) | 0.682 <sup>♠</sup> | 3.6 / 3.0 | 3.2 / 2.0 | 4.2 / 3.0 | 0.059 <sup>¥</sup> |
| a. Negative                                                                              | 6 (9.8%)   | 4 (11.1%)  | 2 (8.0%)   |                    | 4 (11.4%)  | 2 (8.0%)   |                    |           |           |           | 0.045 <sup>▣</sup> |
| b. Neutral                                                                               | 20 (32.8%) | 8 (22.2%)  | 12 (48.0%) |                    | 10 (28.6%) | 10 (40.0%) |                    |           |           |           | 0.134 <sup>Ψ</sup> |
| c. Positive                                                                              |            |            |            |                    |            |            |                    |           |           |           |                    |

\* *Chi-square test.*

♠ *Fisher's exact test.*

¥ *Mann Whitney test.*

▣ *T-test.*

Ψ *Median-test.*
